# Supplementary material
Source: publisher figshare collection journal article supplement (https://tandf.figshare.com/ndownloader/files/22767638)
Supplement: Supplementary file 1 [file 22767638]

**Supplementary Material:**

The Aitken counter 3D CAD drawing can be used for realistic visualization of the instrument and is useful as an instructional tool for academics discussing about historical aerosol instruments.

The Aitken counter drawings can be accessed from <https://github.com/Clarkson-AIRLab/Aitken_drawings>.

The Zip file contains an Autodesk Inventor assembly file of the Aitken Portable Dust Counter, labelled as “Aitken Portable Dust Counter.iam”. Additionally, a folder labelled “Modelled Parts” contains part files of all the individual parts that make up the Dust Counter.  The part files are needed to open the assembly.  The Aitken Portable Dust Counter.iam file can be opened using a CAD package such as Inventor or SOLIDWORKS.  Using Inventor, the parts of the counter can be moved individually.
